# Supplementary material
Source: Springer Nature journal article supplement (https://www.springermedizin.de/resource/supplementary/12957_2013_1542_MOESM1_ESM.pdf/9563598)

## Thyroid Cancers

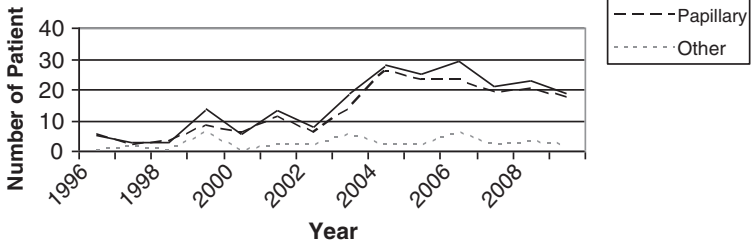

## Papillary Thyroid Cancer

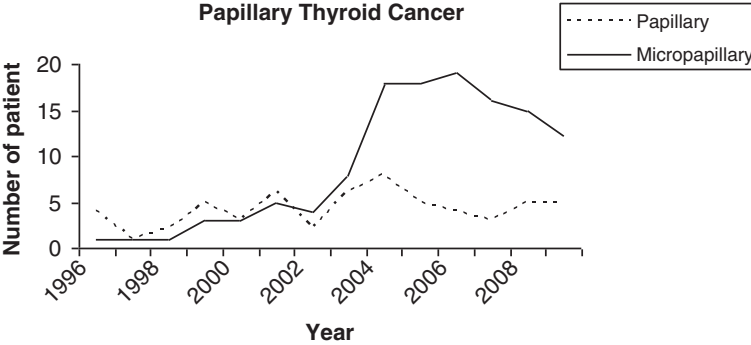

Supplement: MOESM1 [file 9563598]
